# Supplementary material
Source: PubMed Central journal article supplement (PMC8919949)

**Supplemental Digital Content 5.** Receiver operating characteristic (ROC) curves for the diagnostic scores distinguishing patients with MIS-C from patients with either COVID-19, Kawasaki disease (KD), or toxic shock syndrome (TSS), as well as distinguishing patients with MIS-C from patients with each of those conditions separately.

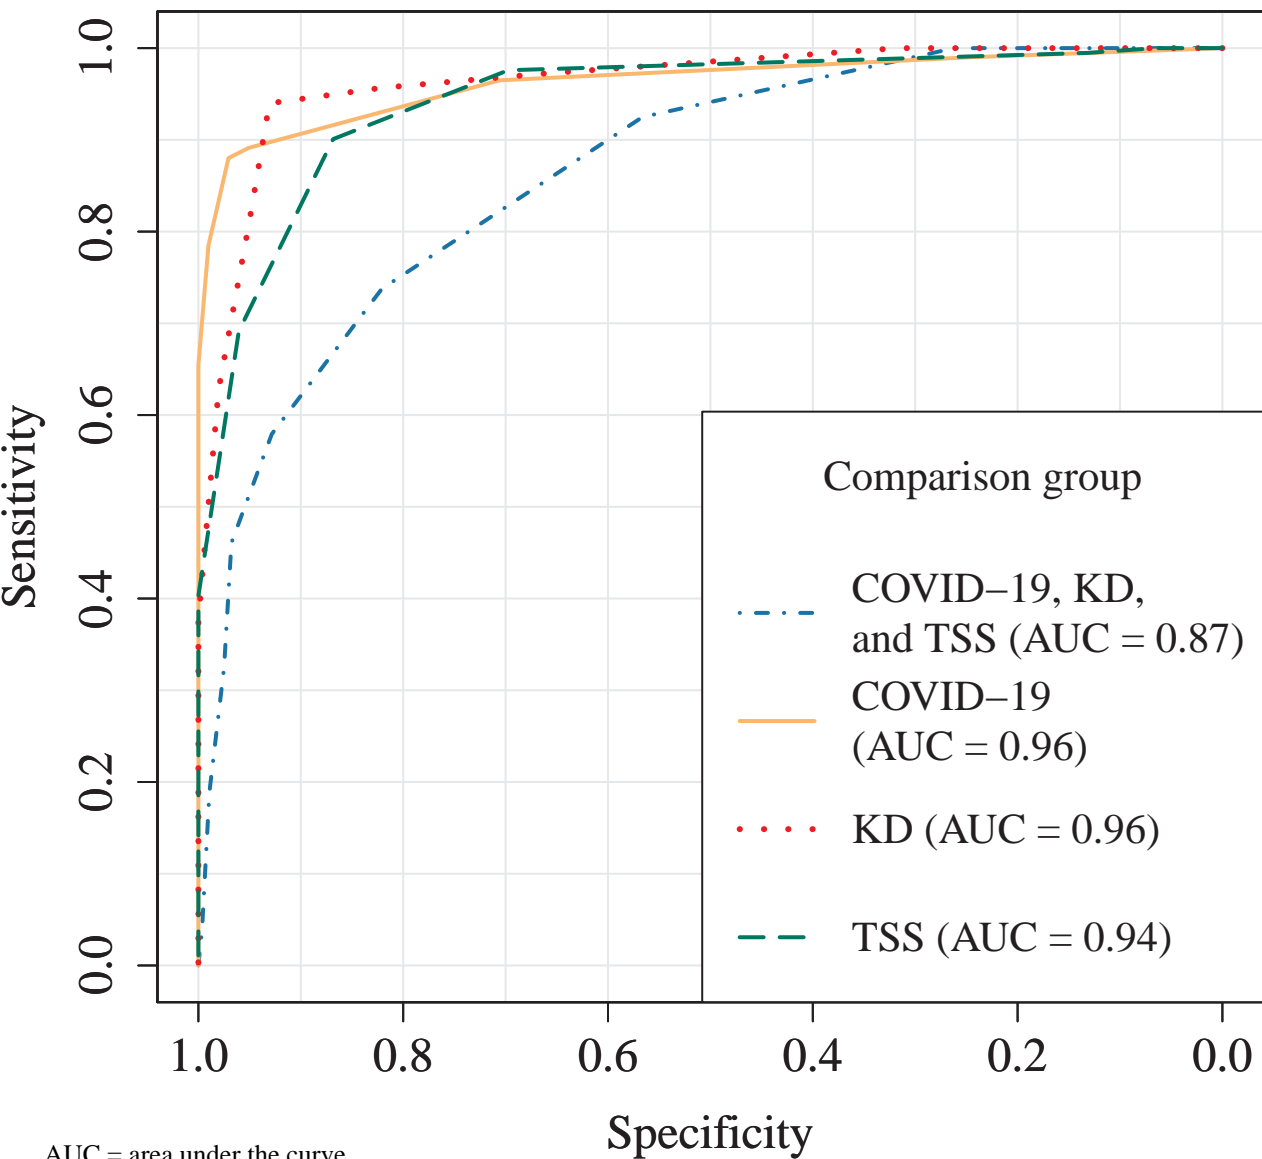

Supplement: inf-41-0315-s005.pdf [file inf-41-0315-s005.pdf]
